# Supplementary material for: Changes in Serum Levels of Ketone Bodies and Human Chorionic Gonadotropin during Pregnancy in Relation to the Neonatal Body Shape: A Retrospective Analysis
Source: MDPI journal article supplement (doi:10.3390/nu14091971), 2022-05-09
Supplement: s1 [file s1]

**Table S1. Human chorionic gonadotropin data of 245 pregnant women.**

|                         | <b>Number</b> | <b>Human chorionic gonadotropin</b> |
|-------------------------|---------------|-------------------------------------|
| <b>Blood test, week</b> |               |                                     |
| 7                       | 1             | 164,000                             |
| 8                       | 68            | 169,000 (63,700-320,000)            |
| 9                       | 47            | 156,000 (149,300-341,000)           |
| 10                      | 48            | 116,500 (45,700-272,000)            |
| 11                      | 45            | 99,800 (4,640-204,000)              |
| 12                      | 26            | 97,800 (13,800-167,000)             |
| 13                      | 9             | 85,700 (2,620-126,000)              |
| 15                      | 1             | 36,000                              |
| 23                      | 14            | 19,600 (3,520-121,000)              |
| 24                      | 55            | 15,000 (564-73,500)                 |
| 25                      | 53            | 19,500 (166-216,000)                |
| 26                      | 77            | 14,700 (1,890-92,900)               |
| 27                      | 42            | 19,750 (7,020-63,900)               |
| 28                      | 3             | 11,600 (8,070-37,300)               |
| 29                      | 1             | 78,000                              |
| 31                      | 1             | 27,700                              |
| 34                      | 1             | 4,040                               |
| 35                      | 56            | 18,150 (195-97,400)                 |
| 36                      | 178           | 23,050 (32-113,000)                 |
| 37                      | 8             | 29,750 (1,780-52,000)               |
| 38                      | 1             | 7,620                               |

---

Blood data are presented as median (range).
